# Supplementary material for: Neonatal outcomes and indirect consequences following maternal SARS-CoV-2 infection in pregnancy: A systematic review
Source: bioRxiv or medRxiv preprint supplement (doi:10.1101/2022.05.20.22275313), 2022-05-21
Supplement: Supplementary file [file media-2.pdf]

## Appendix 1 – Search strategy

Embase search via Ovid, last updated 28/07/2021.

| #  | Searches                                                                                                                                                                                                                                                           | Results |
|----|--------------------------------------------------------------------------------------------------------------------------------------------------------------------------------------------------------------------------------------------------------------------|---------|
| 1  | Pregnan*                                                                                                                                                                                                                                                           | 723025  |
| 2  | Third trimester pregnancy/ or first trimester pregnancy/ or “parameters concerning the fetus, newborn and pregnancy”/ or pregnancy/ or pregnancy complication/ or high risk pregnancy/ or pregnancy disorder/ or second trimester pregnancy/ or pregnancy outcome/ | 498419  |
| 3  | Antenat*                                                                                                                                                                                                                                                           | 51397   |
| 4  | Gestat*                                                                                                                                                                                                                                                            | 297546  |
| 5  | Matern*                                                                                                                                                                                                                                                            | 379690  |
| 6  | Maternity ward/ or maternity care/                                                                                                                                                                                                                                 | 21247   |
| 7  | Breastfeed*                                                                                                                                                                                                                                                        | 35731   |
| 8  | Breast feeding/ or mother/ or breast milk/                                                                                                                                                                                                                         | 140234  |
| 9  | Lactat*                                                                                                                                                                                                                                                            | 227694  |
| 10 | Lactation/                                                                                                                                                                                                                                                         | 39318   |
| 11 | 1 or 2 or 3 or 4 or 5 or 6 or 7 or 8 or 9 or 10                                                                                                                                                                                                                    | 1220052 |
| 12 | COVID*                                                                                                                                                                                                                                                             | 147977  |
| 13 | Sars-cov-2                                                                                                                                                                                                                                                         | 52773   |
| 14 | Coronavirus                                                                                                                                                                                                                                                        | 166814  |
| 15 | Severe acute respiratory syndrome coronavirus 2/ or coronavirus disease 2019/ or coronavirus infection/                                                                                                                                                            | 146237  |
| 16 | 12 or 13 or 14 or 15                                                                                                                                                                                                                                               | 187862  |
| 17 | Stillb*                                                                                                                                                                                                                                                            | 23397   |
| 18 | Stillbirth/ or congenital malformation/                                                                                                                                                                                                                            | 98283   |
| 19 | Intrauterine adj demise                                                                                                                                                                                                                                            | 239     |
| 20 | Intrauterine adj death                                                                                                                                                                                                                                             | 1647    |
| 21 | Pregnancy adj loss                                                                                                                                                                                                                                                 | 10662   |
| 22 | Miscarr*                                                                                                                                                                                                                                                           | 25084   |
| 23 | Spontaneous adj abortion                                                                                                                                                                                                                                           | 39613   |
| 24 | Spontaneous abortion/                                                                                                                                                                                                                                              | 38012   |
| 25 | Fetus death/                                                                                                                                                                                                                                                       | 15764   |
| 26 | 17 or 18 or 19 or 20 or 21 or 22 or 23 or 24 or 25                                                                                                                                                                                                                 | 158662  |
| 27 | Neonat*                                                                                                                                                                                                                                                            | 303927  |
| 28 | Infan*                                                                                                                                                                                                                                                             | 701133  |
| 29 | Newborn/                                                                                                                                                                                                                                                           | 366307  |
| 30 | Infant/ or hospitalized infant/ or infant disease/ or infant mortality/ or high risk infant/ or infant care/                                                                                                                                                       | 477647  |
| 31 | 27 or 28 or 29 or 30                                                                                                                                                                                                                                               | 995198  |
| 32 | Infect*                                                                                                                                                                                                                                                            | 2546071 |
| 33 | Infection/ or infection complication/ or infection risk/ or intrauterine infection/ or perinatal infection/                                                                                                                                                        | 378561  |

|    |                                                                                                                                |         |
|----|--------------------------------------------------------------------------------------------------------------------------------|---------|
| 34 | Sepsis                                                                                                                         | 201867  |
| 35 | Newborn sepsis/ or sepsis/                                                                                                     | 157457  |
| 36 | Nicu or neonatal adj admission                                                                                                 | 2739    |
| 37 | Newborn intensive care/ or neonatal intensive care unit/                                                                       | 37168   |
| 38 | Premat*                                                                                                                        | 263202  |
| 39 | Prematurity/ or premature labour/                                                                                              | 130336  |
| 40 | Small adj for adj gestational adj age or sga                                                                                   | 20340   |
| 41 | Small for date infant/                                                                                                         | 15970   |
| 42 | Low adj birthweight                                                                                                            | 7252    |
| 43 | Low birth weight/                                                                                                              | 31063   |
| 44 | Operative adj delivery                                                                                                         | 1711    |
| 45 | Instrumental delivery/                                                                                                         | 3855    |
| 46 | Caesarean or c-section or cesarean                                                                                             | 107540  |
| 47 | Cesarean section/                                                                                                              | 92477   |
| 48 | Instrumental delivery or ventouse or forceps or vacuum extraction                                                              | 27358   |
| 49 | Vacuum extraction/ or forceps delivery/ or forceps/                                                                            | 13907   |
| 50 | Ventilat*                                                                                                                      | 291355  |
| 51 | Respiratory adj distress                                                                                                       | 100158  |
| 52 | CPAP or BiPAP                                                                                                                  | 18918   |
| 53 | Ventilated patient/ or artificial ventilation/                                                                                 | 137133  |
| 54 | Continuous positive airway pressure/ or bilevel positive airway pressure                                                       | 3083    |
| 55 | Respiratory distress/                                                                                                          | 32246   |
| 56 | Seizure or convulsion or fit                                                                                                   | 361565  |
| 57 | Seizure/ or "seizure, epilepsy or convulsion"/                                                                                 | 133064  |
| 58 | Hypoxic ischaemic encephalopathy or hie                                                                                        | 12140   |
| 59 | Hypoxic ischaemic encephalopathy/                                                                                              | 8490    |
| 60 | Therapeutic cooling or induced hypothermia                                                                                     | 171749  |
| 61 | Brain ischemia/ or induced hypothermia/ or cooling/                                                                            | 171749  |
| 62 | MRI or magnetic resonance imaging or eeg or electroencephalogram or cruss or cranial ultrasound or brain scan or brain imaging | 1108432 |
| 63 | Neuroimaging/ or nuclear magnetic resonance imaging/ or functional magnetic resonance imaging/ or electroencephalogram/        | 1011212 |
| 64 | Hypoton* or hyperton* or abnormal tone or spasticity or cerebral palsy or neurological disease or neurological abnormality     | 118366  |
| 65 | Spasticity/ or cerebral palsy/ or muscle hypertonia/ or neurologic disease/                                                    | 176148  |
| 66 | Cognitive ability or learning difficulty or learning disability or developmental delay                                         | 36605   |
| 67 | Learning disorder/ or developmental delay/ or developmental disorder/ or mental deficiency/                                    | 93582   |

|    |                                                                                           |         |
|----|-------------------------------------------------------------------------------------------|---------|
| 68 | Gastrointestinal disease or nec or necrotising enterocolitis or necrotizing enterocolitis | 104188  |
| 69 | Gastrointesintal disease/ or necrotizing enterocolitis/                                   | 95690   |
| 70 | Visual impairment or visually impaired or blind*                                          | 494101  |
| 71 | Visual impairment/ or blindness/                                                          | 73184   |
| 72 | Hearing impair* or deaf*                                                                  | 87073   |
| 73 | Hearing impairment/                                                                       | 46891   |
| 74 | Quality of life or "quality of life"/                                                     | 637206  |
| 75 | Vertical transmi*                                                                         | 17715   |
| 76 | Vertical transmission/                                                                    | 14908   |
| 77 | 32-76, combined with OR                                                                   | 5907734 |
| 78 | 77 and 31                                                                                 | 459481  |
| 79 | 78 or 26                                                                                  | 593511  |
| 80 | 11 and 16 and 79                                                                          | 1824    |

Medline search via Ovid, last updated 28/07/2021.

| #  | Searches                                                                                                                                                                            | Results |
|----|-------------------------------------------------------------------------------------------------------------------------------------------------------------------------------------|---------|
| 1  | Pregnan*                                                                                                                                                                            | 1047802 |
| 2  | Pregnancy trimester, third/ or pregnancy trimester, second/ or pregnancy trimester, first/ or pregnancy/ or pregnancy, high-risk/ or pregnancy outcome/ or pregnancy complications/ | 911420  |
| 3  | Antenat*                                                                                                                                                                            | 41206   |
| 4  | Prenatal care/                                                                                                                                                                      | 29574   |
| 5  | Gestat*                                                                                                                                                                             | 261469  |
| 6  | Matern*                                                                                                                                                                             | 359413  |
| 7  | Perinatal care/                                                                                                                                                                     | 4983    |
| 8  | Breastfeed*                                                                                                                                                                         | 30017   |
| 9  | Breast feeding/ or mothers/                                                                                                                                                         | 81408   |
| 10 | Lactat*                                                                                                                                                                             | 224527  |
| 11 | Lactation/                                                                                                                                                                          | 44082   |
| 12 | 1 or 2 or 3 or 4 or 5 or 6 or 7 or 8 or 9 or 10 or 11                                                                                                                               | 1454976 |
| 13 | COVID*                                                                                                                                                                              | 156147  |
| 14 | Sars-cov-2                                                                                                                                                                          | 99388   |
| 15 | Coronavirus                                                                                                                                                                         | 98845   |
| 16 | Covid-19/ or sars-cov-2/ or coronavirus/                                                                                                                                            | 97776   |
| 17 | 13 or 14 or 15 or 16                                                                                                                                                                | 175760  |
| 18 | Stillb*                                                                                                                                                                             | 17756   |
| 19 | Stillbirth/                                                                                                                                                                         | 5353    |
| 20 | Intrauterine adj demise                                                                                                                                                             | 142     |
| 21 | Intrauterine adj death                                                                                                                                                              | 1477    |
| 22 | Pregnancy adj loss                                                                                                                                                                  | 6997    |
| 23 | Miscarr*                                                                                                                                                                            | 15892   |
| 24 | Spontaneous adj abortion                                                                                                                                                            | 7719    |

|    |                                                                                                    |         |
|----|----------------------------------------------------------------------------------------------------|---------|
| 25 | Spontaneous abortion/                                                                              | 20453   |
| 26 | Fetal death/ or congenital abnormalities/                                                          | 57641   |
| 27 | 18 or 19 or 20 or 21 or 22 or 23 or 24 or 25 or 26                                                 | 106523  |
| 28 | Neonat*                                                                                            | 309101  |
| 29 | Infan*                                                                                             | 1335539 |
| 30 | Infant, newborn/                                                                                   | 626610  |
| 31 | Infant/ or infant care/ or infant mortality/ or infant death/ or infant health/                    | 841541  |
| 32 | 28 or 29 or 30 or 31                                                                               | 1450833 |
| 33 | Infect*                                                                                            | 2447138 |
| 34 | Infections/                                                                                        | 39946   |
| 35 | Sepsis                                                                                             | 133814  |
| 36 | Neonatal sepsis/ or sepsis/                                                                        | 63823   |
| 37 | Nicu or neonatal admission                                                                         | 11656   |
| 38 | Intensive care units, neonatal/                                                                    | 15858   |
| 39 | Premat*                                                                                            | 223778  |
| 40 | Infant, premature/ or gestational age/ or premature birth/                                         | 139364  |
| 41 | Small for gestational age or sga                                                                   | 16965   |
| 42 | Infant, small for gestational age/ or birth weight/                                                | 46772   |
| 43 | Low adj birthweight                                                                                | 7841    |
| 44 | Infant, low birth weight/                                                                          | 19191   |
| 45 | Operative adj delivery                                                                             | 1256    |
| 46 | Extraction, obstetrical/                                                                           | 2534    |
| 47 | Caesarean or c-section or cesarean                                                                 | 78432   |
| 48 | Cesarean section/ or delivery, obstetric/                                                          | 72546   |
| 49 | Instrumental delivery or ventouse or forceps or vacuum extraction                                  | 14655   |
| 50 | Vacuum extraction, obstetrical/ or obstetrical forceps/                                            | 2720    |
| 51 | Ventilat*                                                                                          | 201282  |
| 52 | Respiratory adj distress                                                                           | 61778   |
| 53 | CPAP or BiPAP or Continuous positive airway pressure or bilevel positive airway pressure           | 16071   |
| 54 | Ventilation/ or respiration, artificial/                                                           | 58137   |
| 55 | Continuous positive airway pressure/ or positive-pressure respiration/ or noninvasive ventilation/ | 27370   |
| 56 | Respiratory distress syndrome/                                                                     | 21490   |
| 57 | Seizure or convulsion or fit                                                                       | 208598  |
| 58 | Seizures/                                                                                          | 56493   |
| 59 | Hypoxic ischaemic encephalopathy or hypoxic ischemic encephalopathy or hie                         | 5083    |
| 60 | Hypoxia-ischaemia, brain/ or asphyxia neonatorum                                                   | 13249   |
| 61 | Therapeutic cooling or induced hypothermia                                                         | 2598    |
| 62 | Brain ischemia/ or hypothermia, induced/                                                           | 75818   |

|    |                                                                                                                                |         |
|----|--------------------------------------------------------------------------------------------------------------------------------|---------|
| 63 | MRI or magnetic resonance imaging or eeg or electroencephalogram or cruss or cranial ultrasound or brain scan or brain imaging | 707043  |
| 64 | Neuroimaging/ or magnetic resonance imaging/ or electroencephalogram/                                                          | 575390  |
| 65 | Hypoton* or hyperton* or abnormal tone or spasticity or cerebral palsy or neurological disease or neurological abnormality     | 103230  |
| 66 | Muscle spasticity/ or cerebral palsy/ or muscle hypertonia/ or muscle hypotonia/ or nervous system diseases/                   | 78506   |
| 67 | Cognitive ability or learning difficulty or learning disability or developmental delay                                         | 23602   |
|    | Learning disabilities/ or developmental disabilities/ or intellectual disability/                                              | 87101   |
| 69 | Gastrointestinal disease or nec or necrotising enterocolitis or necrotizing enterocolitis                                      | 15271   |
| 70 | Gastrointestinal diseases/ or enterocolitis, necrotizing/                                                                      | 43975   |
| 71 | Visual impairment or visually impaired or blind*                                                                               | 395483  |
| 72 | Vision disorders/                                                                                                              | 28486   |
| 73 | Hearing impair* or deaf*                                                                                                       | 62891   |
| 74 | Hearing loss/ or deafness/ or persons with hearing impairments/                                                                | 43064   |
| 75 | Quality of life or "quality of life"/                                                                                          | 380511  |
| 76 | Vertical transmi*                                                                                                              | 7322    |
| 77 | Infectious disease transmission, vertical/                                                                                     | 17257   |
| 78 | 33-77, combined with OR                                                                                                        | 5028529 |
| 79 | 78 and 32                                                                                                                      | 548597  |
| 80 | 79 or 27                                                                                                                       | 636683  |
| 81 | 12 and 17 and 80                                                                                                               | 1143    |

Global health search via Ovid, last updated 28/07/2021

| # | Searches                                                                                                                                                                            | Results |
|---|-------------------------------------------------------------------------------------------------------------------------------------------------------------------------------------|---------|
| 1 | Pregnan*                                                                                                                                                                            | 126717  |
| 2 | Pregnancy trimester, third/ or pregnancy trimester, second/ or pregnancy trimester, first/ or pregnancy/ or pregnancy, high-risk/ or pregnancy outcome/ or pregnancy complications/ | 99638   |
| 3 | Antenat*                                                                                                                                                                            | 17826   |
| 4 | Prenatal care/                                                                                                                                                                      | 3506    |
| 5 | Gestat*                                                                                                                                                                             | 112821  |
| 6 | Matern*                                                                                                                                                                             | 86406   |
| 7 | Breastfeed*                                                                                                                                                                         | 25392   |
| 8 | Breast feeding/ or mothers/                                                                                                                                                         | 51651   |

|    |                                                                                          |         |
|----|------------------------------------------------------------------------------------------|---------|
| 9  | Lactat*                                                                                  | 50673   |
| 10 | Lactation/                                                                               | 12941   |
| 11 | 1 or 2 or 3 or 4 or 5 or 6 or 7 or 8 or 9 or 10                                          | 229179  |
| 12 | COVID*                                                                                   | 36404   |
| 13 | Sars-cov-2                                                                               | 15628   |
| 14 | Coronavirus                                                                              | 44855   |
| 15 | Severe acute respiratory syndrome coronavirus/                                           | 5256    |
| 16 | 12 or 13 or 14 or 15                                                                     | 46013   |
| 18 | Stillb*                                                                                  | 4753    |
| 19 | Stillbirth/                                                                              | 4006    |
| 20 | Intrauterine adj demise                                                                  | 9       |
| 21 | Intrauterine adj death                                                                   | 139     |
| 22 | Pregnancy adj loss                                                                       | 923     |
| 23 | Miscarr*                                                                                 | 3987    |
| 24 | Spontaneous adj abortion                                                                 | 3435    |
| 25 | Spontaneous abortion/                                                                    | 2942    |
| 26 | Fetal death/ or congenital abnormalities/                                                | 15922   |
| 27 | 18 or 19 or 20 or 21 or 22 or 23 or 24 or 25 or 26                                       | 21539   |
| 28 | Neonat*                                                                                  | 59142   |
| 29 | Infan*                                                                                   | 156485  |
| 30 | Neonates/ or infants/                                                                    | 122421  |
| 31 | Infant care/ or infant mortality/ or infant death/ or infant health/                     | 5195    |
| 32 | 28 or 29 or 30 or 31                                                                     | 176742  |
| 33 | Infect*                                                                                  | 1187975 |
| 34 | Infections/                                                                              | 488566  |
| 35 | Sepsis                                                                                   | 25827   |
| 36 | Sepsis/                                                                                  | 18064   |
| 37 | Nicu or neonatal admission                                                               | 2676    |
| 38 | Premat*                                                                                  | 32208   |
| 39 | Premature infants/ or prematurity/                                                       | 20675   |
| 40 | Small for gestational age or sga                                                         | 4240    |
| 41 | Infant, small for gestational age/ or birth weight/                                      | 13532   |
| 42 | Low adj birthweight                                                                      | 3185    |
| 43 | Low birth weight infants/                                                                | 8798    |
| 44 | Operative adj delivery                                                                   | 117     |
| 45 | Caesarean or c-section or cesarean                                                       | 9334    |
| 46 | Caesarean section/                                                                       | 5734    |
| 47 | Instrumental delivery or ventouse or forceps or vacuum extraction                        | 863     |
| 48 | Parturition complications/                                                               | 1384    |
| 49 | Ventilat*                                                                                | 20633   |
| 50 | Respiratory adj distress                                                                 | 6548    |
| 51 | CPAP or BiPAP or Continuous positive airway pressure or bilevel positive airway pressure | 701     |
| 52 | Ventilation/ or artificial respiration/                                                  | 4243    |

|    |                                                                                                                                |         |
|----|--------------------------------------------------------------------------------------------------------------------------------|---------|
| 53 | Acute respiratory distress syndrome/                                                                                           | 1453    |
| 54 | Seizure or convulsion or fit                                                                                                   | 27459   |
| 55 | Seizures/                                                                                                                      | 3152    |
| 56 | Hypoxic ischaemic encephalopathy or hypoxic ischemic encephalopathy or hie                                                     | 456     |
| 57 | Therapeutic cooling or induced hypothermia                                                                                     | 157     |
| 58 | MRI or magnetic resonance imaging or eeg or electroencephalogram or cruss or cranial ultrasound or brain scan or brain imaging | 15860   |
| 59 | Magnetic resonance imaging/ or electroencephalogram/                                                                           | 6065    |
| 60 | Hypoton* or hyperton* or abnormal tone or spasticity or cerebral palsy or neurological disease or neurological abnormality     | 5668    |
| 61 | Cerebral palsy/ or nervous system diseases/                                                                                    | 18651   |
| 62 | Cognitive ability or learning difficulty or learning disability or developmental delay                                         | 1816    |
| 63 | Learning disabilities/ or mental disorders/ or people with mental disabilities/                                                | 49942   |
| 64 | Gastrointestinal disease or nec or necrotising enterocolitis or necrotizing enterocolitis                                      | 3697    |
| 65 | Gastrointestinal diseases/                                                                                                     | 10201   |
| 66 | Visual impairment or visually impaired or blind*                                                                               | 48935   |
| 67 | Vision disorders/                                                                                                              | 3331    |
| 68 | Hearing impair* or deaf*                                                                                                       | 5024    |
| 69 | Hearing impairment/ or deafness/ or people with hearing impairment/                                                            | 4259    |
| 70 | Quality of life or "quality of life"/                                                                                          | 35856   |
| 71 | Vertical transmi*                                                                                                              | 5345    |
| 72 | Vertical transmission/                                                                                                         | 3839    |
| 73 | 33-72, combined with OR                                                                                                        | 1392378 |
| 74 | 72 and 32                                                                                                                      | 93930   |
| 75 | 74 or 27                                                                                                                       | 110446  |
| 76 | 75 and 16 and 11                                                                                                               | 570     |

#### LILACS

|   |                                    |      |
|---|------------------------------------|------|
| 1 | SARS-CoV-2 or COVID or Coronavirus | 8903 |
|---|------------------------------------|------|
